# Supplementary material
Source: publisher figshare collection journal article supplement (https://acs.figshare.com/ndownloader/files/13687565)
Supplement: Supplementary file 1 [file 13687565]

## Supporting Information

### Sialic Acid-Functionalized PEG-PLGA Microspheres Loading Mitochondrial Targeting Modified Curcumin for Acute Lung Injury Therapy

Feiyang Jin, Di Liu, Hui Yu, Jing Qi, Yuchan You, Li Wang, Xiaojuan Wang, Xiaoling Xu, Xuqi Kang,  
Kongjun Lu, Xiaoying Ying, Jian You, Yongzhong Du\*, Jiansong Ji\*

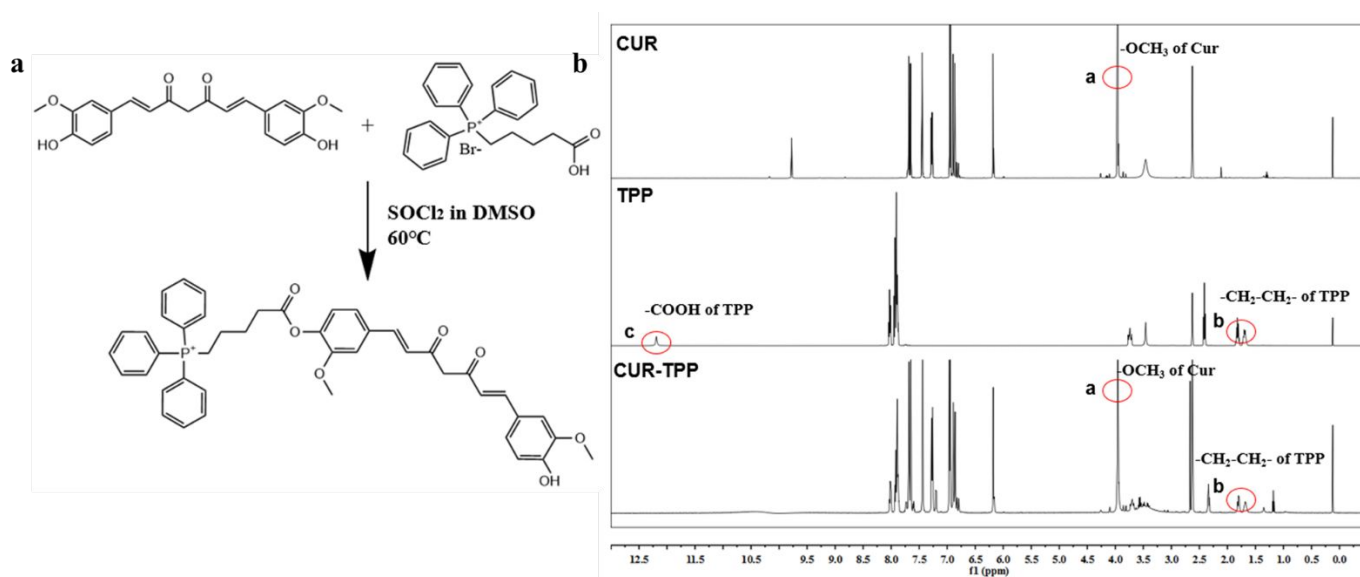

**Figure S1.** Synthesis and characterization of Cur-TPP. (a) Synthetic route of Cur-TPP prodrug. (b) <sup>1</sup>H NMR spectrum of Cur, TPP, Cur-TPP.

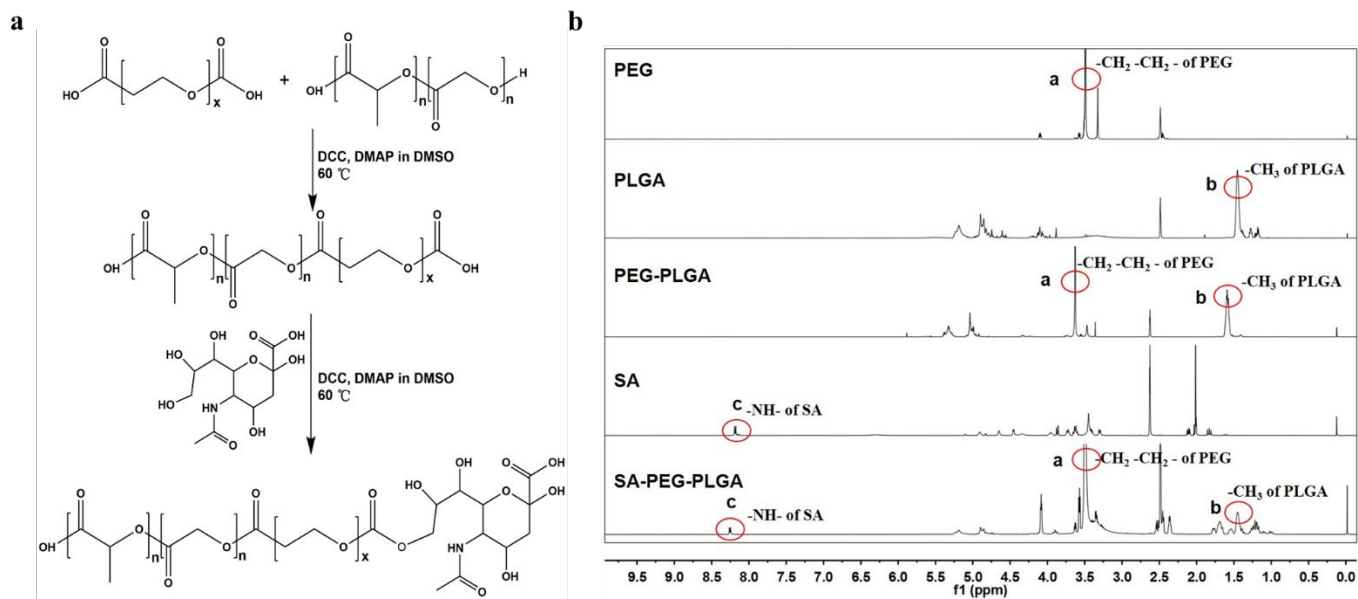

**Figure S2.** Synthesis and characterization of SA-PEG-PLGA. (a) Synthetic route of SA-PEG-PLGA conjugates. (b)  $^1\text{H}$  NMR spectrum of SA, PEG, PLGA, PEG-PLGA, SA-PEG-PLGA conjugates.

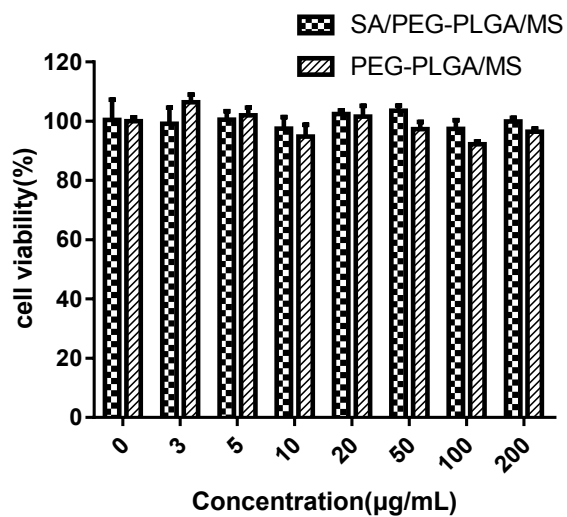

**Figure S3.** The cell viability assessment on blank SA/PEG-PLGA/MS and PEG-PLGA/MS via MTT assay.

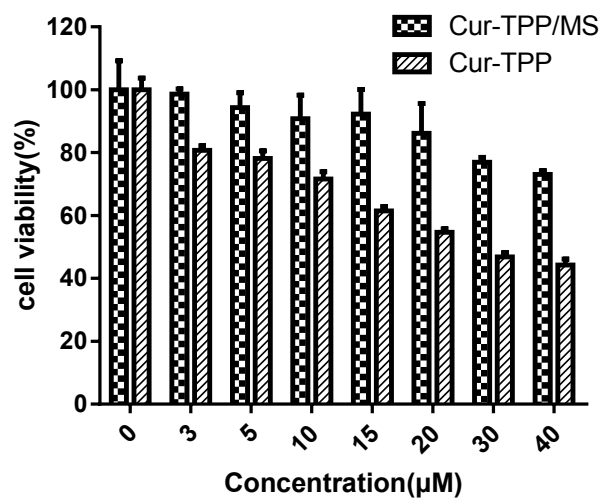

**Figure S4.** The cell viability assessment on and free Cur-TPP and Cur-TPP loaded microspheres via MTT assay.

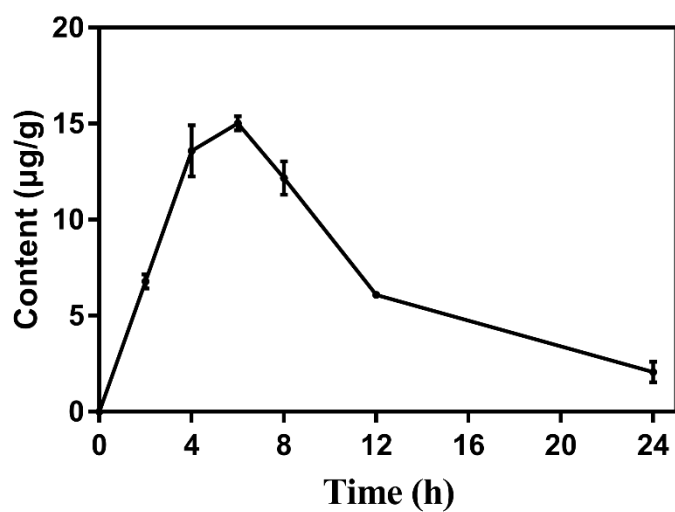

**Figure S5.** The concentration-time curve of SA/PEG-PLGA/MS in lungs

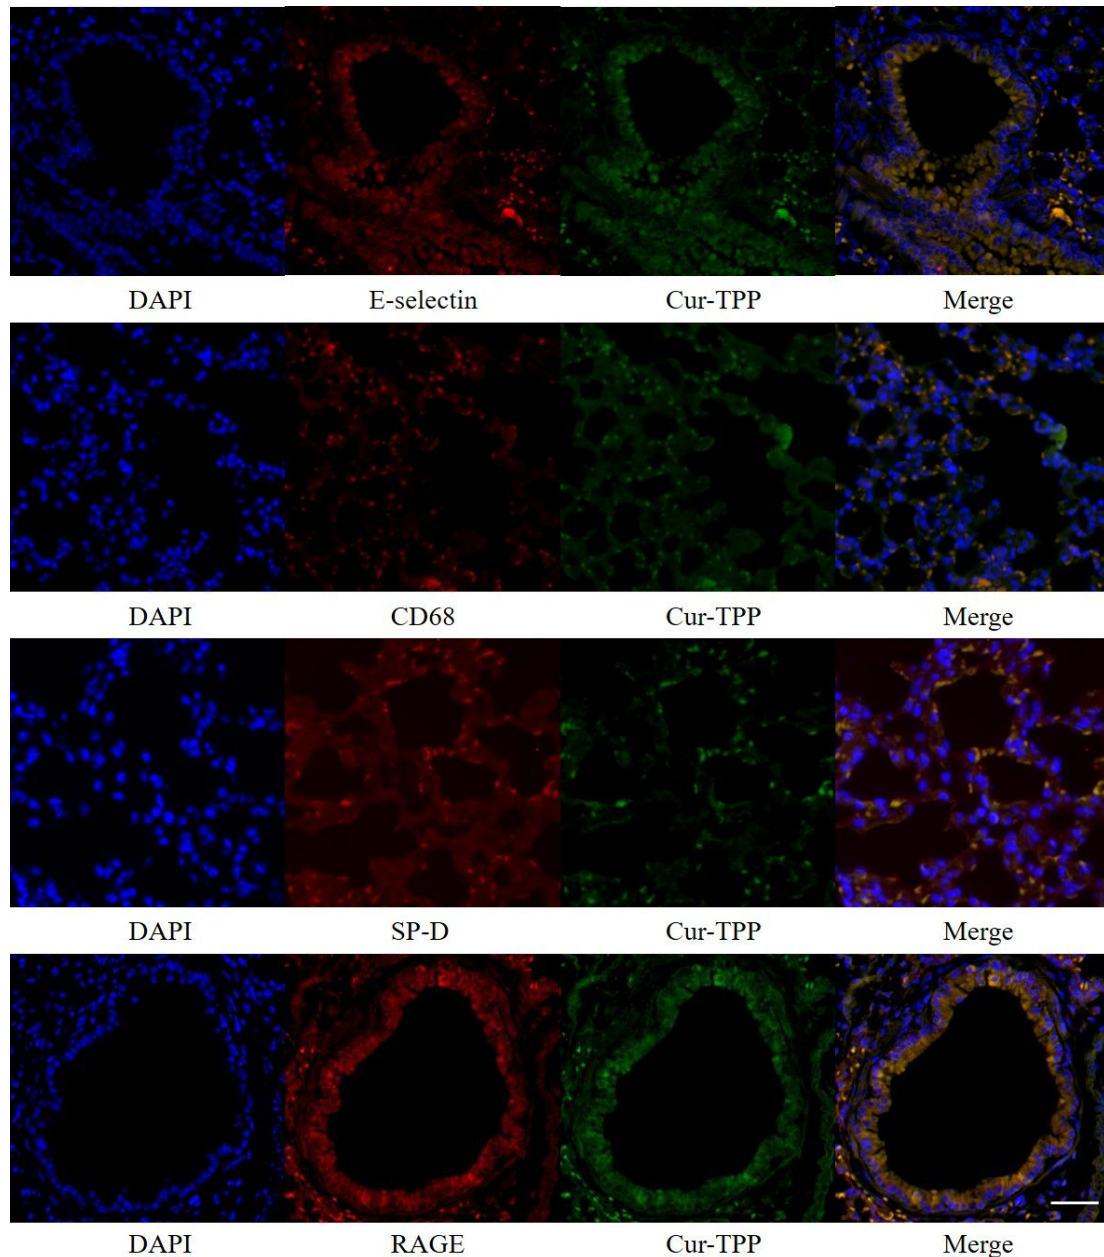

**Figure S6.** The distribution of SA/Cur-TPP/MS in endothelial, macrophages, type 2 epithelial and type 1 epithelial cells in lungs respectively. Imaging of immunohistochemistry staining of ALI lungs with SA/Cur-TPP/MS injected for 6h. Endothelial cells were stained with TRITC conjugated E-selectin antibody. Macrophages were stained with TRITC conjugated anti-CD68 antibody. Type 2 epithelial cells were stained with TRITC conjugated anti-SP-D antibody. Type 1 epithelial cells were



stained with TRITC conjugated anti-RAGE antibody. (scale bar = 50  $\mu$ m )

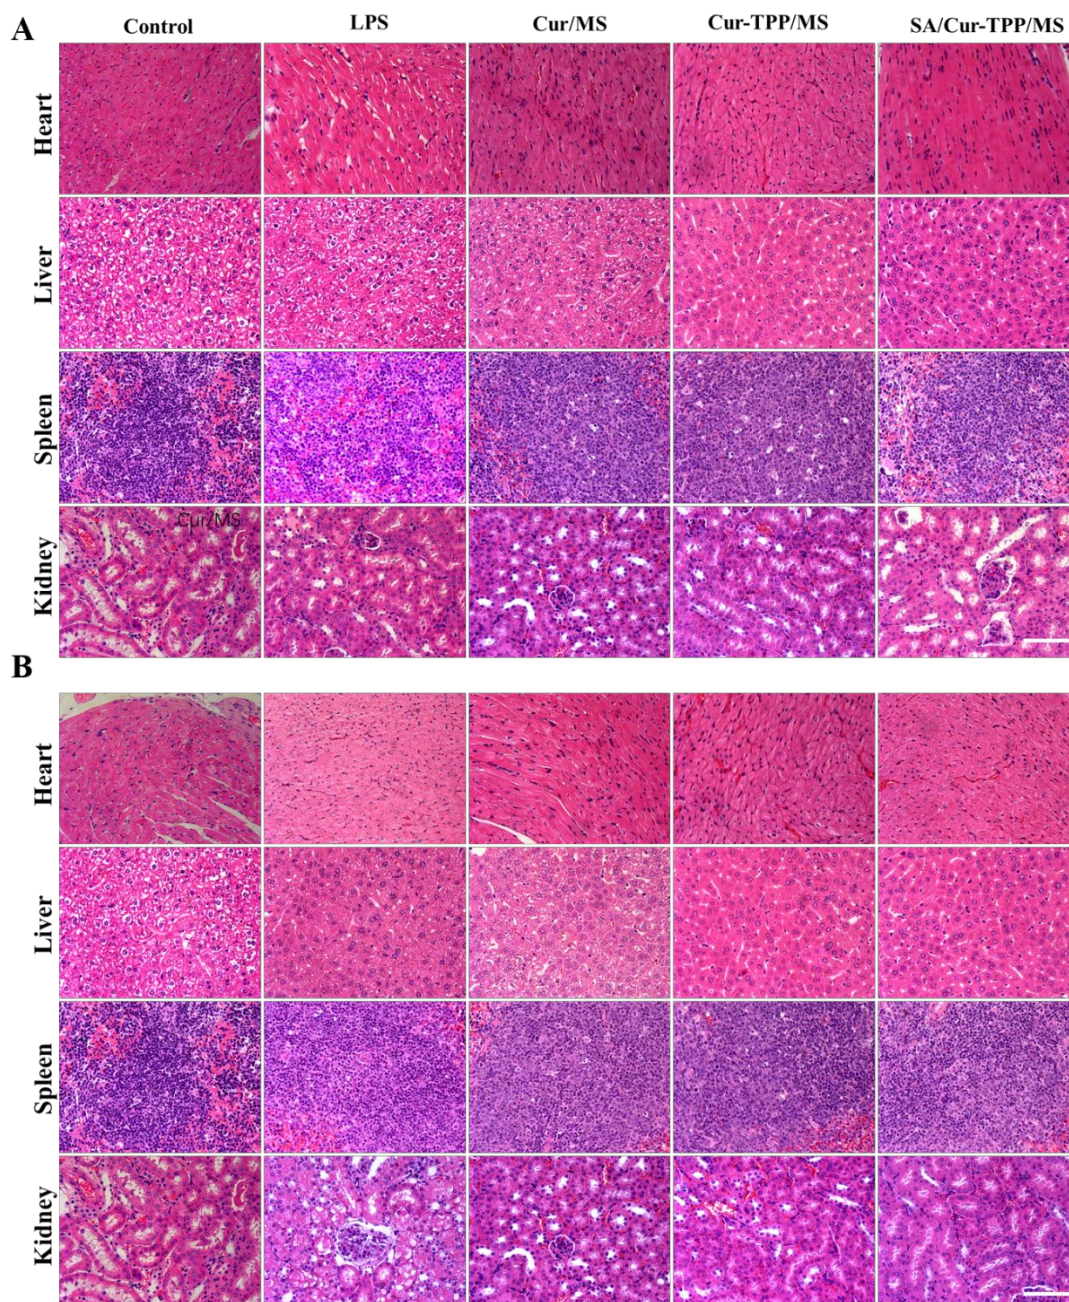

**Figure S7.** Adverse effects of mice treated with various microspheres. Histopathology in hearts, livers, spleens and kidneys were identified using hematoxylin-eosin staining after 24h (A) and 48h (B) treatment

respectively. (scale bar = 100 $\mu$ m)
